# Supplementary material for: Pan-Renal Cell Carcinoma classification and survival prediction from histopathology images using deep learning
Source: PubMed Central journal article supplement (PMC6642160; doi:10.1038/s41598-019-46718-3), 2019-07-19
Supplement: 41598_2019_46718_MOESM1_ESM.pdf [file 41598_2019_46718_MOESM1_ESM.pdf]

## Supplementary Information

### **Pan-Renal Cell Carcinoma classification and survival prediction from histopathology images using deep learning**

Sairam Tabibu<sup>1,\*</sup>, P.K. Vinod<sup>2,+</sup> and C.V. Jawahar<sup>1,†</sup>

<sup>1</sup>Center for Visual Information Technology, IIIT, Hyderabad, India

<sup>2</sup>Center for Computational Natural Sciences and Bioinformatics, IIIT Hyderabad, Hyderabad, India

\*t.sairam.ece13@iitbhu.ac.in

+vinod.pk@iiit.ac.in

†jawahar@iiit.ac.in

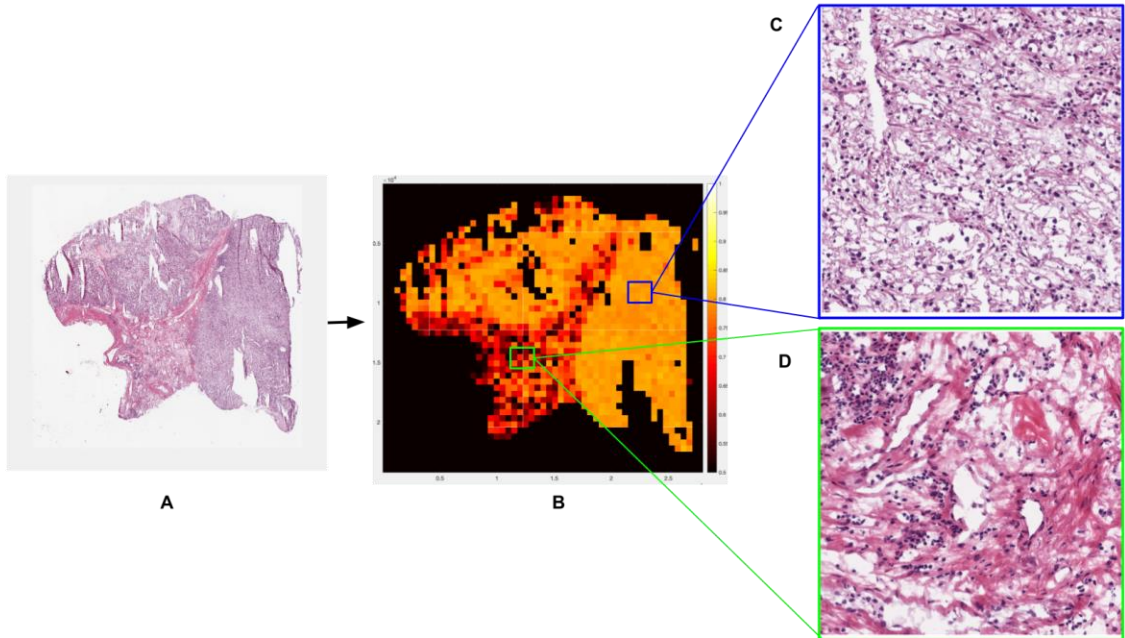

**Supplementary Figure 1:** Visualization of High probability regions of KIRC. High probability regions (displayed in blue) and low probability regions (displayed in green).

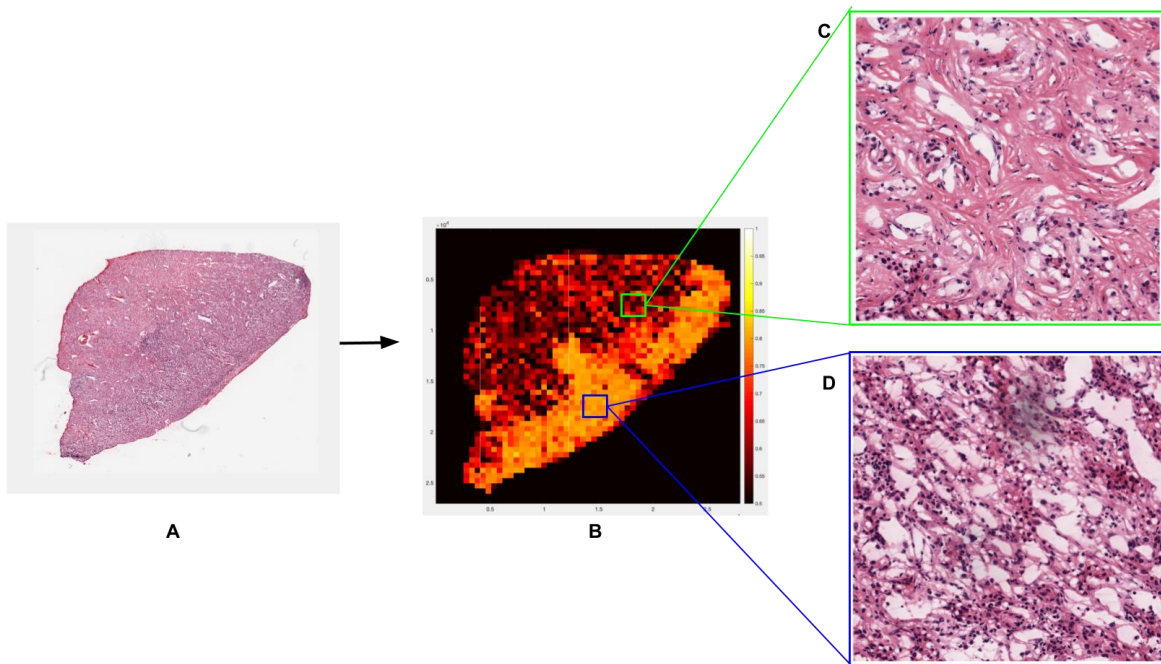

**Supplementary Figure 2:** Visualization of high probability regions of KIRC. High probability regions (shown in blue) and low probability regions (shown in green).

**Supplementary Table 1:** Number of slides and patches of normal and tumor at different resolutions for KIRC.

| <b>Resolution</b> | <b>Tissue</b> | <b>Training</b> | <b>Validation</b> | <b>Testing</b> |
|-------------------|---------------|-----------------|-------------------|----------------|
| 20X               | Cancerous     | 719(213302)     | 154(55463)        | 154(42907)     |
| 20X               | Normal        | 379(115856)     | 81(23434)         | 81(23401)      |
| 40X               | Cancerous     | 719(672586)     | 154(163093)       | 154(130399)    |
| 40X               | Normal        | 379(428719)     | 81(88406)         | 81(92581)      |

**Supplementary Table 2:** Number of slides and patches of normal and tumor at different resolutions for KIRP.

| <b>Resolution</b> | <b>Tissue</b> | <b>Training</b> | <b>Validation</b> | <b>Testing</b> |
|-------------------|---------------|-----------------|-------------------|----------------|
| 20X               | Cancerous     | 179(74626)      | 39(23613)         | 38(13577)      |
| 20X               | Normal        | 33(6102)        | 7(1285)           | 7(908)         |
| 40X               | Cancerous     | 179(235858)     | 39(83855)         | 38(81267)      |
| 40X               | Normal        | 33(21614)       | 7(4365)           | 7(5418)        |

**Supplementary Table 3:** Number of slides and patches of normal and tumor at different resolutions for KICH.

| <b>Resolution</b> | <b>Tissue</b> | <b>Training</b> | <b>Validation</b> | <b>Testing</b> |
|-------------------|---------------|-----------------|-------------------|----------------|
| 20X               | Cancerous     | 106(202912)     | 23(50811)         | 22(45218)      |
| 20X               | Normal        | 58(97899)       | 13(20610)         | 12(32538)      |
| 40X               | Cancerous     | 106(647960)     | 23(172033)        | 22(164026)     |
| 40X               | Normal        | 58(374812)      | 13(78663)         | 12(126294)     |

**Supplementary Table 4:** Model performance for each subtype with Vanilla CNN in the subtype classification.

| <b>Model</b> | <b>Subtype</b> | <b>Accuracy</b> |
|--------------|----------------|-----------------|
| Resnet 18    | KIRC           | 97.09%          |
|              | KIRP           | 69.75%          |
|              | KICH           | 85.36%          |
|              |                |                 |
| Resnet 34    | KIRC           | 97.35%          |
|              | KIRP           | 72.49%          |
|              | KICH           | 79.72%          |

**Supplementary Table 5:** Model performance for each subtype with DAG-SVM + Vanilla CNN in the subtype classification.

| <b>Model</b> | <b>Subtype</b> | <b>Accuracy</b> |
|--------------|----------------|-----------------|
| Resnet 18    | KIRC           | 94.84%          |
|              | KIRP           | 77.25%          |
|              | KICH           | 95.12%          |
|              |                |                 |
| Resnet 34    | KIRC           | 91.30%          |
|              | KIRP           | 82.41%          |
|              | KICH           | 95.47%          |

**Supplementary Table 6:** Effect of data augmentation and weighted sampling on subtype classification.

| <b>Model</b>                           | <b>Accuracy</b> | <b>Precision</b> | <b>Recall</b> | <b>Kappa score</b> |
|----------------------------------------|-----------------|------------------|---------------|--------------------|
| Resnet 18                              | 87.69           | 88.82            | 83.66         | 0.794              |
| Resnet 34                              | 86.19           | 88.30            | 83.18         | 0.770              |
| Resnet 18(DAG-SVM)                     | <b>92.62</b>    | 90.78            | 89.07         | <b>0.877</b>       |
| Resnet 34(DAG-SVM)                     | 91.96           | 88.94            | 87.92         | 0.867              |
| Resnet 18(weighted sampling)           | 91.44           | 89.37            | 89.77         | 0.859              |
| Resnet 34(weighted sampling)           | 92.16           | 90.31            | 90.76         | 0.871              |
| Resnet 18(weighted sampling + DAG-SVM) | <b>93.79</b>    | 92.40            | 90.48         | <b>0.897</b>       |
| Resnet 34(weighted sampling + DAG-SVM) | <b>94.07</b>    | 90.85            | 92.67         | <b>0.902</b>       |
| Resnet 18 (augmentation)               | 91.40           | 90.77            | 87.86         | 0.857              |
| Resnet 34 (augmentation)               | 91.47           | 90.38            | 89.44         | 0.859              |
| Resnet 18 (augmentation + DAG-SVM)     | <b>93.68</b>    | 91.43            | 90.86         | <b>0.895</b>       |

**Supplementary Table 7:** Classification of normal tissues of RCC subtypes using the model trained to detect subtypes.

| <b>Model</b> | <b>Precision</b> | <b>Recall</b> | <b>AUC</b> |
|--------------|------------------|---------------|------------|
| Resnet 18    | 79.88%           | 79.85%        | 0.85       |
| Resnet 34    | 79.44%           | 79.12%        | 0.85       |

**Supplementary Table 8:** KIRC Patient characteristics.

| <b>KIRC</b>               | <b>Summary</b> | <b>Median</b> |
|---------------------------|----------------|---------------|
| <b>Number of Patients</b> | 469            |               |
| <b>Status</b>             |                |               |
| Alive                     | 310            |               |
| Dead                      | 159            |               |
| <b>Age</b>                |                |               |
|                           | 26-90 years    | 61.42 years   |
| <b>Gender</b>             |                |               |
| Male                      | 300            |               |
| Female                    | 169            |               |
| <b>Grade</b>              |                |               |
| 1                         | 10             |               |
| 2                         | 188            |               |
| 3                         | 175            |               |
| 4                         | 58             |               |
| <b>Stage</b>              |                |               |
| 1                         | 228            |               |
| 2                         | 49             |               |
| 3                         | 117            |               |
| 4                         | 73             |               |

**Supplementary Table 9:** Features extracted for survival analysis.

| <b>Tumor Shape Features</b>       | <b>Tumor Nuclei Features</b> |
|-----------------------------------|------------------------------|
| Main region area                  | Total Area                   |
| Main region convex area           | Total filled area            |
| Main region filled area           | Total convex area            |
| Main region perimeter             | Total Perimeter              |
| Main region major axis            | Total Minor axis             |
| Total peri(squared) by area       | Total Major Axis             |
| Main region minor axis            | Total peri(squared) by area  |
| Main region peri(squared) by area |                              |
| Main region eccentricity          |                              |
| Main region solidity              |                              |
| Main region angle                 |                              |
| Total area                        |                              |
| Total convex area                 |                              |
| Total filled area                 |                              |
| Total major axis                  |                              |
| Total minor axis                  |                              |
| Total perimeter                   |                              |
| Total peri(squared) by area       |                              |
